# Supplementary material for: Design, synthesis and in vitro biological evaluation of isoxazol-4-carboxa piperidyl derivatives as new anti-influenza A agents targeting virus nucleoprotein
Source: Royal Society of Chemistry journal article supplement (doi:10.1039/c9ra10828a), 2020-01-01
Supplement: c9ra10828a1.pdf [file c9ra10828a1.pdf]

**Supporting Information**

---

**Design, synthesis and in Vitro Biological Evaluation of Isoxazol-4-  
carboxa piperidyl Derivatives as New Anti-influenza A Agents  
Targeting Virus Nucleoprotein**

Shuchen Pei, Shihao Xia, Fating Yang, Junlin Chen, Mengdie Wang, Wanlin Sun, Ziqiang Li,  
Kangyao Yuan, and Jun Chen\*

School of Chemistry and Chemical Engineering, Chongqing University of Science and  
Technology, Chongqing 401331, P.R. China.

\*E-mail: wxchenjun@163.com

**CONTENTS**

**Page 2-3:** Concentration-response curves of target compounds

**Page 4-16:** NMR Spectrum of target compounds:

## Supporting Information

Concentration-response curves of target compounds **1a-1j** and Ribavirin.





1g



1h



1i



1j

## Supporting Information

$^1\text{H}$  NMR and  $^{13}\text{C}$  NMR Spectrum of target compounds:



# Supporting Information



# Supporting Information



# Supporting Information



# Supporting Information



# Supporting Information



# Supporting Information



# Supporting Information



# Supporting Information



# Supporting Information





# Supporting Information



# Supporting Information
